# Supplementary material for: Blooms of Toxic Cyanobacterium Nodularia spumigena in Norwegian Fjords During Holocene Warm Periods
Source: PubMed Central journal article supplement (PMC7232221; doi:10.3390/toxins12040257), 2020-04-15
Supplement: toxins-12-00257-s001.pdf [file toxins-12-00257-s001.pdf]

# Supplementary Materials: Blooms of the toxic cyanobacterium *Nodularia spumigena* in Norwegian fjords during Holocene warm periods

Robert Konkell, Anna Toruńska-Sitarz, Marta Cegłowska, Žilvinas Ežerinskis, Justina Šapolaite, Jonas Mažeika and Hanna Mazur-Marzec

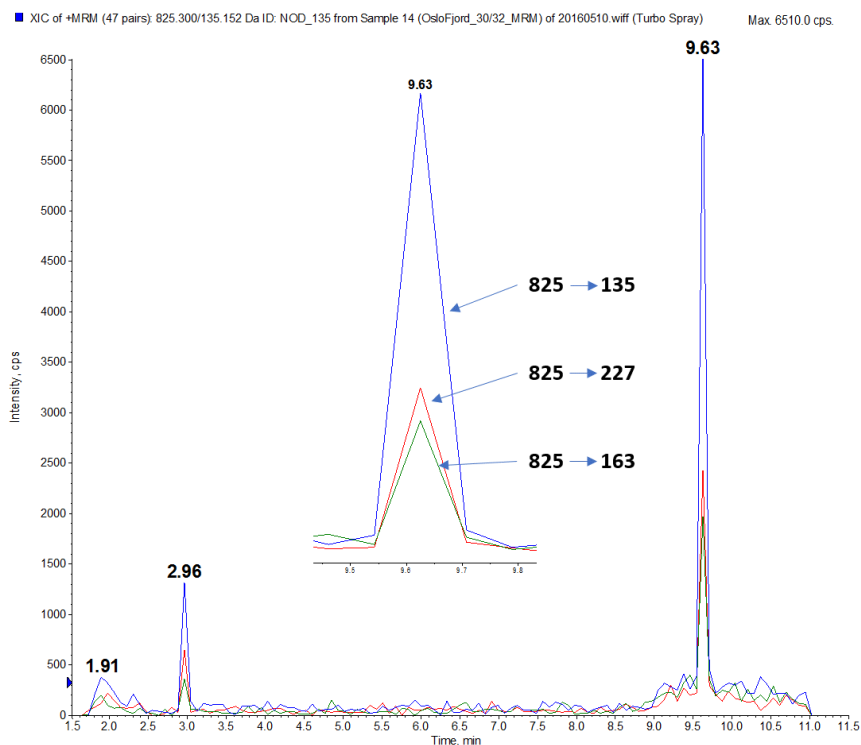

**Figure S1.** MRM chromatogram of nodularin (NOD) extracted from 30–32 cm layer of the long core (LC) collected in Oslofjorden.

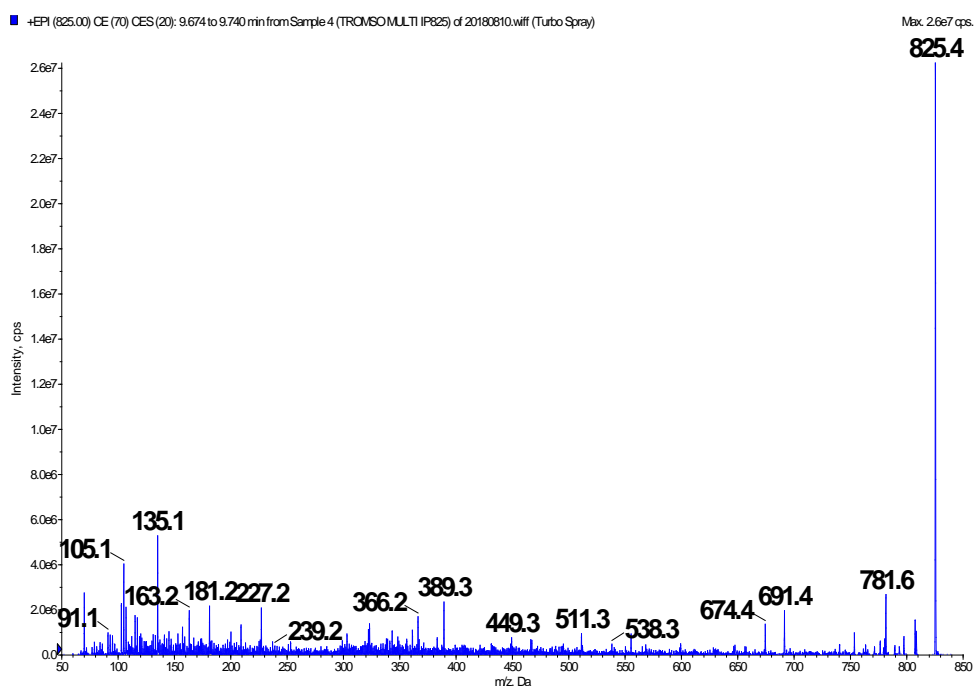

**Figure S2.** Enhanced product ion mass spectra (EPI) of nodularin (NOD) extracted from the long sediment core collected in Balsfjorden.

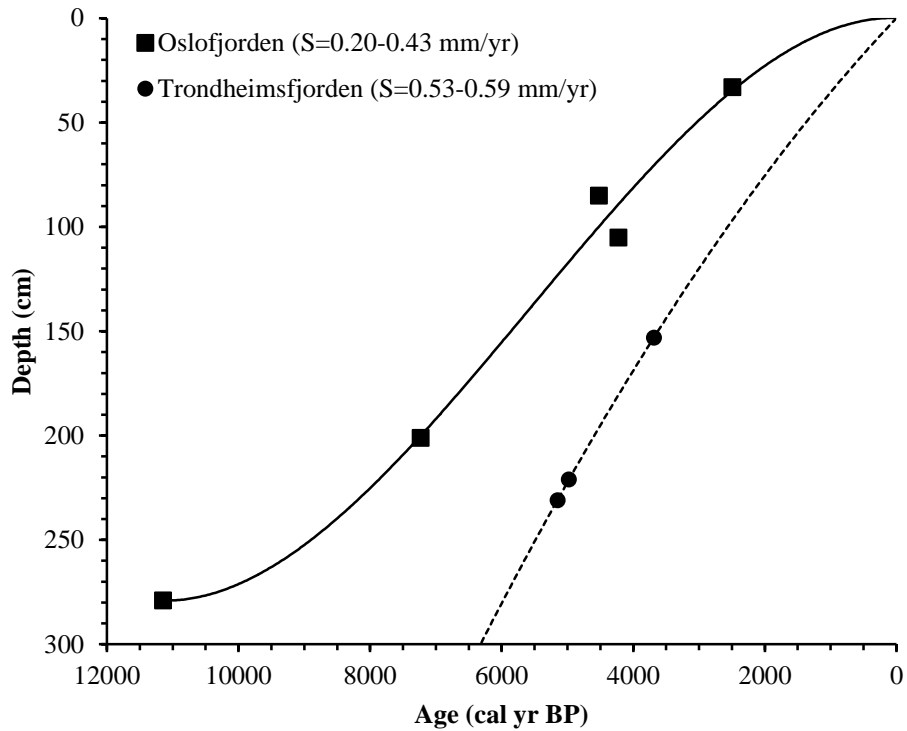

**Figure S3.** Age-depth models for two studied long sediment cores (Oslofjorden and Balsfjorden). The sedimentation rate ranges are given in brackets. The model shows that the sedimentation rates for Trondheimsfjorden were higher (0.53–0.59 mm/yr), but their variations are lower, compared to Oslofjorden (0.20–0.43 mm/yr). In Oslofjorden sedimentation rate in older times was lower (0.20 mm/yr) than in recent times (0.32–0.43 mm/yr).

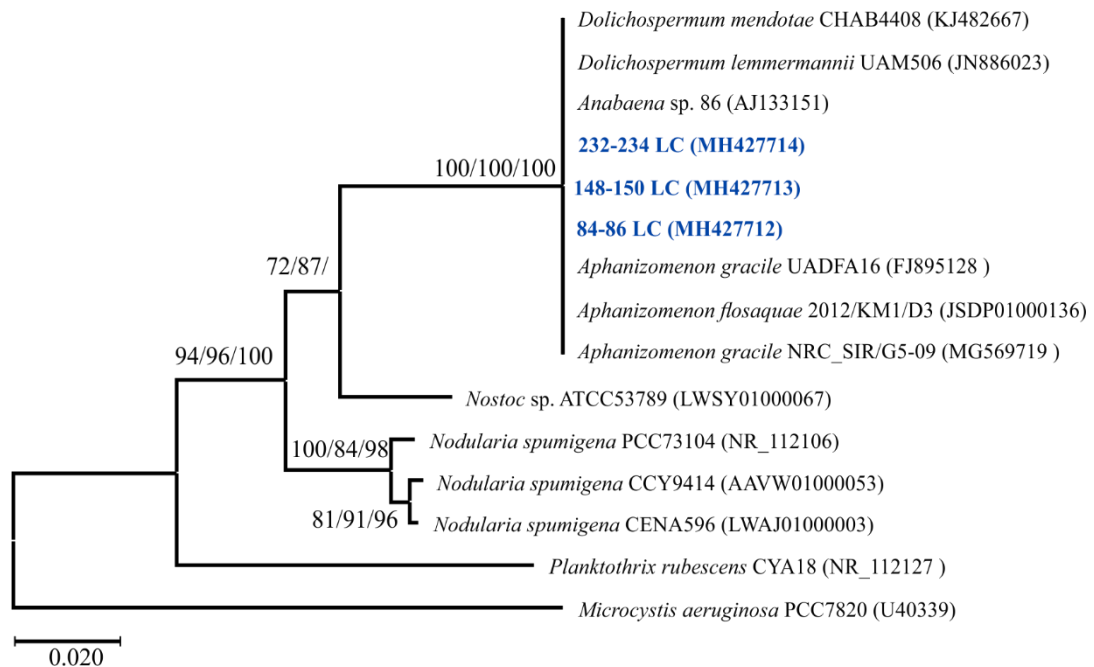

**Figure S4.** Neighbour-joining phylogenetic tree based on the 16S rDNA sequences (504 bp) obtained from DNA isolated from Oslofjorden (marked in blue) and reference sequences (retrieved from NCBI). Phylogenetic relationships were bootstrapped 1000 times.

**Table S1.** Changes in nodularin contents (NOD) [ng/g dw] and changes in relative amounts of anabaenopeptin AP883a (expressed as a ratio of AP peak area/g dw) in the short core (SC) and long core (LC) from Oslofjorden (\* results for individual 2 cm layers).

| Core layer [cm]        | NOD<br>[ng/g dw] | AP 883a<br>peak area |
|------------------------|------------------|----------------------|
| <b>Short core (SC)</b> |                  |                      |
| 0–8*                   | -                | -                    |
| 8–10                   | 1.15             | 597.49               |
| 10–40*                 | -                | -                    |
| <b>Long core (LC)</b>  |                  |                      |
| 0–2                    | 1.21             | -                    |
| 2–4                    | 0.32             | traces               |
| 4–6                    | 0.47             | 1530.13              |
| 6–8                    | 0.85             | 1135.28              |
| 8–10                   | 0.90             | 1727.59              |
| 10–12                  | 1.09             | 691.04               |
| 12–14                  | 1.64             | -                    |
| 14–16                  | 1.26             | -                    |
| 16–18                  | 1.56             | traces               |
| 18–20                  | 0.98             | traces               |
| 20–22                  | 1.54             | 1382.06              |
| 22–24                  | 1.49             | -                    |
| 24–26                  | 1.16             | 789.76               |
| 26–28                  | 1.25             | 1283.33              |
| 28–30                  | 1.33             | 1135.24              |
| 30–32                  | 1.80             | 937.83               |
| 32–34                  | 3.84             | 1283.36              |
| 34–36                  | 1.27             | -                    |
| 36–38                  | 1.15             | 2023.72              |
| 38–40                  | 1.76             | -                    |
| 40–42                  | 1.17             | -                    |
| 42–43                  | 1.53             | 1233.99              |
| 44–46                  | 0.52             | 1085.92              |
| 46–48                  | 0.69             | -                    |
| 48–50                  | 0.62             | -                    |
| 50–52                  | 0.74             | 2369.23              |
| 52–54                  | 0.84             | 740.40               |
| 54–56                  | 0.95             | -                    |
| 56–58                  | 0.94             | 1678.23              |
| 58–60                  | 1.31             | -                    |
| 60–62                  | 1.04             | -                    |
| 62–64                  | 1.09             | -                    |
| 64–66                  | 1.09             | traces               |
| 66–68                  | 0.99             | -                    |
| 68–70                  | 1.14             | -                    |
| 70–72                  | 1.22             | -                    |
| 72–74                  | 1.02             | -                    |
| 74–76                  | 1.35             | -                    |
| 76–78                  | 1.02             | traces               |
| 78–80                  | 1.11             | -                    |
| 80–82                  | 1.08             | 937.81               |
| 82–84                  | 1.11             | -                    |
| 84–86                  | 1.68             | -                    |
| 86–88                  | 1.53             | -                    |
| 88–90                  | 1.21             | -                    |
| 90–92                  | 1.21             | -                    |
| 92–94                  | 0.67             | -                    |

|         |      |   |
|---------|------|---|
| 94-96   | 0.43 | - |
| 96-98   | 0.84 | - |
| 98-100  | 1.57 | - |
| 100-102 | 0.80 | - |
| 102-104 | 0.37 | - |
| 104-106 | 0.33 | - |
| 106-108 | 0.27 | - |
| 108-110 | 0.52 | - |
| 110-112 | 0.65 | - |
| 112-114 | 0.61 | - |
| 114-116 | 0.82 | - |
| 116-118 | 0.29 | - |
| 118-120 | 0.82 | - |
| 120-122 | 0.63 | - |
| 122-124 | 0.50 | - |
| 124-126 | 0.35 | - |
| 126-128 | 0.39 | - |
| 128-130 | 0.33 | - |
| 130-132 | 0.31 | - |
| 132-134 | 0.52 | - |
| 134-136 | 0.50 | - |
| 136-138 | 0.45 | - |
| 138-140 | 0.58 | - |
| 140-142 | 0.28 | - |
| 142-144 | 0.32 | - |
| 144-146 | 0.31 | - |
| 146-148 | 0.28 | - |
| 148-150 | 0.21 | - |

| Core layer [cm]       | NOD<br>[ng/g dw] | AP 883a<br>peak area |
|-----------------------|------------------|----------------------|
| <b>Long core (LC)</b> |                  |                      |
| 152-154               | 0.23             | -                    |
| 154-156               | 0.32             | -                    |
| 156-158               | 0.29             | -                    |
| 158-160               | 0.30             | -                    |
| 160-162               | 0.29             | -                    |
| 162-164               | 0.35             | -                    |
| 164-166               | 0.24             | -                    |
| 166-168               | 0.23             | -                    |
| 168-170               | 0.26             | -                    |
| 170-172               | 0.21             | -                    |
| 172-174               | 0.37             | -                    |
| 174-176               | 0.31             | -                    |
| 176-178               | 0.29             | -                    |
| 178-180               | 0.44             | -                    |
| 180-182               | 0.33             | -                    |
| 182-184               | 0.30             | -                    |
| 184-186               | 0.46             | -                    |
| 186-188               | 0.31             | -                    |
| 188-190               | 0.34             | -                    |
| 190-192               | 0.36             | -                    |
| 192-194               | 0.48             | -                    |
| 194-196               | 0.14             | -                    |
| 196-198               | 0.45             | -                    |
| 198-200               | 0.66             | -                    |
| 200-202               | 0.45             | -                    |
| 202-204               | 0.49             | -                    |
| 204-206               | 0.43             | -                    |

|          |      |   |
|----------|------|---|
| 206-208  | 0.48 | - |
| 208-210  | 0.53 | - |
| 210-212  | 0.48 | - |
| 212-214  | 0.07 | - |
| 214-216  | 0.07 | - |
| 216-218  | -    | - |
| 218-220  | 0.08 | - |
| 220-222  | -    | - |
| 222-224  | 0.07 | - |
| 224-226  | 0.07 | - |
| 226-228  | -    | - |
| 228-230  | -    | - |
| 230-232  | -    | - |
| 232-234  | -    | - |
| 234-236  | -    | - |
| 236-238  | 0.03 | - |
| 238-240  | 0.14 | - |
| 240-242  | 0.19 | - |
| 242-244  | 0.23 | - |
| 244-246  | 0.23 | - |
| 246-248  | 0.29 | - |
| 248-250  | 0.18 | - |
| 250-252  | 0.21 | - |
| 252-254  | 0.21 | - |
| 254-256  | 0.34 | - |
| 256-258  | 0.20 | - |
| 258-260  | 0.26 | - |
| 260-262  | 0.22 | - |
| 262-264  | 0.08 | - |
| 264-266  | 0.15 | - |
| 266-268  | 0.13 | - |
| 268-270  | 0.07 | - |
| 270-272  | 0.10 | - |
| 272-274  | 0.06 | - |
| 274-276  | -    | - |
| 276-278  | 0.19 | - |
| 278-280  | 0.10 | - |
| 280-282  | 0.08 | - |
| 282-284  | -    | - |
| 284-286  | 0.30 | - |
| 286-288  | -    | - |
| 288-290  | -    | - |
| 290-292  | -    | - |
| 292-294  | 0.53 | - |
| 294-296  | 0.08 | - |
| 296-298  | -    | - |
| 298-300  | 0.11 | - |
| 300-302  | -    | - |
| 302-304  | 0.06 | - |
| 304-334* | -    | - |

---

**Table S2.** Calibrated age of sediment samples from the Norwegian fjords.

| Sampling station<br>Layer [cm] | Calibrated age<br>[yr BP] |
|--------------------------------|---------------------------|
| Balsfjorden 152–154            | 3540–3830                 |
| Balsfjorden 220–222            | 4820–5140                 |
| Balsfjorden 230–232            | 4990–5310                 |
| Oslofjorden 32–34              | 2330–2660                 |
| Oslofjorden 84–86              | 4360–4690                 |
| Oslofjorden 104–106            | 4070–4380                 |
| Oslofjorden 200–202            | 7100–7370                 |
| Oslofjorden 278–280            | 11000–11300               |
| Trondheimsfjorden 92–94        | 4200–4520                 |

**Table S3.** Changes in nodularin contents (NOD) [ng/g dw] and changes in relative amounts of anabaenopeptin AP883a (expressed as a ratio of AP peak area/g dw) in the long core (LC) from Trondheimsfjorden (\*results for individual 2 cm layers; # results for integrated 10 cm sections).

| Core layer<br>[cm]                                | NOD<br>[ng/g dw] | AP      | Calibrated age[yr BP] |
|---------------------------------------------------|------------------|---------|-----------------------|
| <b>Long core (LC) (integrated 10-cm sections)</b> |                  |         |                       |
| 0–60#                                             | -                | -       |                       |
| 60–70                                             | 0.05             | -       |                       |
| 70–80                                             | 0.02             | -       |                       |
| 80–90                                             | 0.11             | -       |                       |
| 90–100                                            | 0.63             | AP 883a |                       |
| 100–110                                           | 0.04             | -       |                       |
| 110–120                                           | 0.08             | -       |                       |
| 120–130                                           | 0.03             | -       |                       |
| 130–136                                           | 0.07             | -       |                       |
| <b>Long core (LC) (2-cm layers)</b>               |                  |         |                       |
| 0–90*                                             | -                | -       |                       |
| 90–92                                             | 0.09             | AP 883a |                       |
| 92–94                                             | 0.27             | AP 883a | 4200–4520             |
| 94–136*                                           | -                | -       |                       |

**Table S4.** Changes in nodularin contents (NOD) [ng/g dw] and changes in relative amounts of anabaenopeptins (APs) (expressed as a ratio of AP peak area/g dw) in the long core (LC) from Balsfjorden (\*results for individual 2 cm layers; # results for integrated 10 cm sections).

| Core layer<br>[cm]                                | NOD<br>[ng/g dw] | AP      | Calibrated age<br>[yr BP] |
|---------------------------------------------------|------------------|---------|---------------------------|
| <b>Long core (LC) (integrated 10 cm sections)</b> |                  |         |                           |
| 0–140#                                            | -                | -       |                           |
| 140–150                                           | 0.14             | -       |                           |
| 150–160                                           | 0.22             | AP 827  |                           |
| 160–220#                                          | -                | -       |                           |
| 220–230                                           | 0.80             | AP 883a |                           |
| 230–240                                           | 1.19             | -       |                           |
| 240–260#                                          | -                | -       |                           |
| 260–270                                           | 0.18             | -       |                           |
| 270–440#                                          | -                | -       |                           |
| <b>Long core (LC) (2-cm layers)</b>               |                  |         |                           |
| 0–152*                                            | -                | -       |                           |
| 152–154                                           | traces           | -       | 3540–3830                 |
| 154–204*                                          | -                | -       |                           |
| 204–206                                           | 0.10             | -       |                           |
| 206–220*                                          | -                | -       |                           |
| 220–222                                           | 0.58             | AP 883a | 4820–5140                 |
| 222–224                                           | 0.08             | -       |                           |
| 224–226                                           | 0.05             | -       |                           |
| 226–228*                                          | -                | -       |                           |
| 228–230                                           | 0.02             | -       |                           |
| 230–232                                           | 0.41             | -       | 4990–5310                 |
| 232–234                                           | -                | -       |                           |
| 234–236                                           | 0.40             | -       |                           |
| 236–238                                           | 0.19             | -       |                           |
| 238–240                                           | 0.10             | -       |                           |
| 262–272*                                          | -                | -       |                           |
